# Supplementary material for: Role of transition metals on MoS2-based supported catalysts for hydrodeoxygenation (HDO) of propylguaiacol
Source: Royal Society of Chemistry journal article supplement (doi:10.1039/d1se00184a), 2021-01-01
Supplement: d1se00184a1.pdf [file d1se00184a1.pdf]

## Electronic Supplementary Information

### Role of transition metals on MoS<sub>2</sub>-based supported catalysts for hydrodeoxygenation (HDO) of Propylguaiacol

You Wayne Cheah<sup>a</sup>, Muhammad Abdus Salam<sup>a</sup>, Prakhar Arora<sup>a,b</sup>, Olov Öhrman<sup>b</sup>, Derek Creaser<sup>a</sup> and Louise Olsson<sup>a,\*</sup>

<sup>a</sup>*Competence Centre for Catalysis, Chemical Engineering, Chalmers University of Technology, Gothenburg, 41296, Sweden*

<sup>b</sup>*Preem AB Sweden*

\*Corresponding author: [louise.olsson@chalmers.se](mailto:louise.olsson@chalmers.se)

#### **Kraft lignin liquid product analysis (2D GC × GC-MS-FID analysis)**

The individual product selectivity in the liquid was calculated by dividing the corresponding MS blob volume of the product by the total MS blob volume for all identifiable products in the liquids.

The bio-liquid products were also analyzed by GC × GC-MS-FID on Agilent 7890B gas chromatograph equipped with an oven, a flow splitter, a modulator, and a flame ionization detector. The injector temperature was 280 °C and the sample injection volume was 1 μL. Helium gas was used as a carrier gas with a flow rate of 1 mL/min with a split ratio of 30. The chromatographic separation involves two columns: a mid-polar phase column VF-1701MS (30 m × 250 μm × 0.25 μm) and a non-polar phase column DB-5MS UI (1.2 m × 150 μm × 0.15 μm). Modulation time on the modulator is 8 s. The oven temperature was initially set at 40 °C for 1 min and then heated up to 280 °C at a rate of 2 °C/min. The flame ionization detector temperature was set at 250 °C. The hydrogen flow rate is 30 mL/min and the airflow rate is 350 mL/min. The analysis was performed using the GCImage software for multidimensional chromatography.

Table S1: State of the art sulfided catalysts for HDO of phenolics.

| Entry | Sulfided catalysts                                        | Model compound (Phenolics) | Solvent  | Conversion (%) | Reaction parameters (reactor type, reaction time, temperature, and pressure) | Major products (selectivity %)                                                                          | Ref |
|-------|-----------------------------------------------------------|----------------------------|----------|----------------|------------------------------------------------------------------------------|---------------------------------------------------------------------------------------------------------|-----|
| 1     | MoS <sub>2</sub>                                          | 4-propylguaiacol           | Dodecane | 99.2           | Batch, 6 h, 300 °C and 40 bar                                                | Propylcyclohexane (5%), 4-Propylcyclohexene (2.9%), Propylbenzene (57.4%) and 4-Propylphenol (34.7%)    | 1   |
| 2     | NiS <sub>2</sub> -MoS <sub>2</sub>                        | 4-propylguaiacol           | Dodecane | 99.7           | Batch, 6 h, 275 °C and 40 bar                                                | Propylcyclohexane (31.6%), 4-Propylcyclohexene (0.6%), Propylbenzene (47.4%) and 4-Propylphenol (20.4%) | 1   |
| 3     | CoS <sub>2</sub> -MoS <sub>2</sub>                        | 4-propylguaiacol           | Dodecane | 100            | Batch, 6 h, 250 °C and 40 bar                                                | Propylcyclohexane (13.4%), 4-Propylcyclohexene (0.6%), Propylbenzene (83.7%) and 4-Propylphenol (2.3%)  | 1   |
| 4     | Commercial sulphided NiMo/γAl <sub>2</sub> O <sub>3</sub> | Phenol                     | Dodecane | -              | Continuous, WHSV = 29/ 36 h <sup>-1</sup> , 200/ 220/ 250 °C and 30 bar      | Cyclohexene (traces), Cyclohexane (93.4%) and benzene (6.5%) for 200 °C and 29 h <sup>-1</sup>          | 2   |
| 5     | Commercial reduced NiMo/γAl <sub>2</sub> O <sub>3</sub>   | Phenol                     | Dodecane | 100            | Continuous, WHSV = 11/ 21 h <sup>-1</sup> , 130/ 145 °C and 30 bar           | Cyclohexene (<2.5%), Cyclohexane (10%) and Cyclohexanol (90%) for 130 °C and 11 h <sup>-1</sup>         | 2   |
| 6     | CoMoS                                                     | p-cresol                   | Decalin  | 100 after 3 h  | Batch, 4 h, 300 °C and 40 bar                                                | Arene yield (98%)                                                                                       | 3   |
| 7     | CoMo/Al <sub>2</sub> O <sub>3</sub> -TiO <sub>2</sub>     | Phenol                     | Dodecane | 93             | Batch, 4 h, 320 °C and 54 bar                                                | Benzene (65%), Cyclohexane (25%) and Cyclohexene (3%)                                                   | 4   |
| 8     | RuS <sub>2</sub> /SBA-15                                  | Phenol                     | Decalin  | 9              | Continuous, WHSV = 1.28 h <sup>-1</sup> , 310 °C, TOS = 4 h and 30 bar       | Cyclohexane (40%), Cyclohexene (54%), Benzene (3%) and Cyclohexanol (3%)                                | 5   |
| 9     | Ir-RuS <sub>2</sub> /SBA-15                               | Phenol                     | Decalin  | 41             | Continuous, WHSV = 1.28 h <sup>-1</sup> , 310 °C, TOS = 4 h and 30 bar       | Cyclohexane (63%), Cyclohexene (11%), Benzene (7%) and Cyclohexanol (19%)                               | 5   |
| 10    | Pt-RuS <sub>2</sub> /SBA-15                               | Phenol                     | Decalin  | 37             | Continuous, WHSV = 1.28 h <sup>-1</sup> , 310 °C, TOS = 4 h and 30 bar       | Cyclohexane (62%), Cyclohexene (11%), Benzene (11%) and Cyclohexanol (16%)                              | 5   |
| 11    | Ni/W/TiO <sub>2</sub>                                     | Guaiacol                   | n-decane | 100            | Batch, 2.5 h, 300 °C and 70 bar                                              | Phenol (37%), Cyclohexane (16%), Benzene (1%), Creasol (3%) and others (43%)                            | 6   |
| 12    | NiMo/Al <sub>2</sub> O <sub>3</sub>                       | 2-ethylphenol              | toluene  | 23             | Continuous, 1.11 min (contact time), 340 °C and 70 bar                       | Oxygenated compounds (19.1%) and deoxygenated compounds (80.9%)                                         | 7   |
| 13    | CoMo/Al <sub>2</sub> O <sub>3</sub>                       | 2-ethylphenol              | toluene  | 24             | Continuous 1.15 min (contact time), 340 °C and 70 bar                        | Oxygenated compounds (27.7%) and deoxygenated compounds (72.3%)                                         | 7   |

|    |                                                                                                      |                                                                                                                                                  |                               |        |                                                               |                                                                                                                                                                               |    |
|----|------------------------------------------------------------------------------------------------------|--------------------------------------------------------------------------------------------------------------------------------------------------|-------------------------------|--------|---------------------------------------------------------------|-------------------------------------------------------------------------------------------------------------------------------------------------------------------------------|----|
| 14 | Mo/Al <sub>2</sub> O <sub>3</sub>                                                                    | 2-ethylphenol                                                                                                                                    | toluene                       | 22     | Continuous<br>2.3 min (contact<br>time), 340 °C and<br>70 bar | Oxygenated<br>compounds (48.4%)<br>and deoxygenated<br>compounds (51.6%)                                                                                                      | 7  |
| 15 | NiWS supported<br>on TiO <sub>2</sub> , ZrO <sub>2</sub> ,<br>and TiO <sub>2</sub> -ZrO <sub>2</sub> | Guaiacol                                                                                                                                         | Hexadecane                    | 100    | Batch, 320 °C, 55<br>bar H <sub>2</sub> , and 1000<br>rpm     | 80% cycloalkanes<br>(NiWS-TiO <sub>2</sub> )                                                                                                                                  | 8  |
| 16 | CoMoS<br>supported on<br>Al <sub>2</sub> O <sub>3</sub>                                              | Phenol/2-ethylphenol                                                                                                                             | Toluene                       | -      | Continuous, 400<br>°C, 70 bar                                 | HDO activity (29.1<br>mmol. h <sup>-1</sup> g <sup>-1</sup> ) for<br>phenol and (22<br>mmol.h <sup>-1</sup> g <sup>-1</sup> ) for 2-<br>ethylphenol                           | 9  |
| 17 | NiMoS/CoMoS<br>supported on γ-<br>Al <sub>2</sub> O <sub>3</sub>                                     | Guaiacol/Phenol                                                                                                                                  | m-xylene<br>/n-<br>hexadecane | 30-100 | Continuous/batch,<br>200-350 °C, 75-80<br>bar                 | Cycloalkanes (55% for<br>NiMo and 45% for<br>CoMo) at 300 °C                                                                                                                  | 10 |
| 18 | CoMoS<br>supported on<br>Al <sub>2</sub> O <sub>3</sub>                                              | Phenol, o-cresol, anisole,<br>4-methylanisole, catechol,<br>guaiacol, 4-<br>methylguaiacol, 1,3-<br>dimethoxybenzene,<br>syringol, and vanillin. | Dodecane                      | 25-90  | Batch, 4 h, 300 °C<br>and, 50 bar                             | See ref <sup>11</sup>                                                                                                                                                         | 11 |
| 19 | NiMoS supported<br>on γ- Al <sub>2</sub> O <sub>3</sub>                                              | Phenol and methyl<br>heptanoate                                                                                                                  | Dodecane                      | 100    | Batch, 200/250 °C,<br>and 75 bar                              | Cyclohexane (85%),<br>cyclohexyl<br>cyclohexane (14%),<br>and others (1%)                                                                                                     | 12 |
| 20 | CoMoP/MgO                                                                                            | Phenol                                                                                                                                           | Supercritical<br>hexane       | 17-90  | Batch, 350-450<br>°C, 1 h and 50 bar                          | Benzene (65%) and<br>other (26%) at 450 °C                                                                                                                                    | 13 |
| 21 | NiMoS/CoMoS<br>supported on γ-<br>Al <sub>2</sub> O <sub>3</sub>                                     | Phenol and methyl<br>heptanoate                                                                                                                  | m-xylene                      | 5-28   | Batch/continuous,<br>250 °C, 1 h and 15<br>bar                | See ref <sup>14</sup>                                                                                                                                                         | 14 |
| 22 | CoMoS<br>supported on<br>Al <sub>2</sub> O <sub>3</sub>                                              | Methyl-substituted<br>phenols                                                                                                                    | n-heptane/n-<br>decane        | 10-50  | Continuous, 300<br>°C and 28.5 bar                            | See ref <sup>15</sup>                                                                                                                                                         | 15 |
| 23 | CoMoS on<br>activated carbon                                                                         | Guaiacol, ethyldecanoate,<br>and 4-<br>methylacetophenone                                                                                        | -                             | 17-19  | Continuous, 270<br>°C and 75 bar                              | See ref <sup>16</sup>                                                                                                                                                         | 16 |
| 24 | MoS <sub>2</sub> on<br>activated carbon                                                              | Guaiacol                                                                                                                                         | Decalin                       | 10-30  | Batch, 300 °C, 50<br>bar, and 1000 rpm                        | See ref <sup>17</sup>                                                                                                                                                         | 17 |
| 25 | MoS <sub>2</sub> on<br>activated carbon                                                              | Guaiacol                                                                                                                                         | Dodecane                      | 55     | Batch, 300 °C, 50<br>bar, 5 h and 1000<br>rpm                 | Phenol (52%),<br>Cycloalkanes (12.2%),<br>cyclohexanol (5%),<br>anisole (0.3%),<br>benzene (0.4%),<br>catechol (1.8%),<br>veratrole (0.8%),<br>methanol (0.04%) and<br>gases. | 18 |
| 26 | ReS <sub>2</sub> /SiO <sub>2</sub>                                                                   | Guaiacol and phenol                                                                                                                              | Hexadecane<br>and<br>dodecane | 15-20  | Batch, 250 °C, 50<br>bar, and 4 h                             | For guaiacol, phenol<br>(13%), catechol (1%),<br>and cyclohexanol<br>(0.5%)                                                                                                   | 19 |
| 27 | ReS <sub>2</sub> /SiO <sub>2</sub>                                                                   | Guaiacol                                                                                                                                         | Dodecane                      | 80     | Batch, 300 °C, 50<br>bar, and 4 h                             | For ReS <sub>2</sub> /SiO <sub>2</sub> , phenol<br>(60%), cyclohexane<br>(20%) and others.                                                                                    | 20 |
| 28 | ReS <sub>2</sub> /activated<br>carbon                                                                | Guaiacol                                                                                                                                         | Dodecane                      | 40-80  | Batch, 300 °C, 50<br>bar, and 4 h                             | See ref <sup>21</sup>                                                                                                                                                         | 21 |
| 29 | ReS <sub>2</sub> /SiO <sub>2</sub> (Al <sub>2</sub> O <sub>3</sub> )                                 | Guaiacol and 4,6-<br>dimethyldibenzothiophene                                                                                                    | Dodecane                      | 80     | Batch, 300 °C, 50<br>bar, and 4 h                             | See ref <sup>22</sup>                                                                                                                                                         | 22 |
| 30 | Re/ZrO <sub>2</sub> and<br>Re/ZrO <sub>2</sub> -<br>sulphated                                        | Guaiacol                                                                                                                                         | Decaline                      | 10-70  | Batch, 300 °C, 50<br>bar, and 4 h                             | See ref <sup>23</sup>                                                                                                                                                         | 23 |
| 31 | CoS <sub>2</sub> /MoS <sub>2</sub>                                                                   | Creosol and phenol<br>derivatives                                                                                                                | Dodecane                      | 18-98  | Batch, 250 °C, 40<br>bar, and 1 h                             | For CoMo-0.3, toluene<br>(99%)                                                                                                                                                | 24 |
| 32 | MoS <sub>2</sub> and<br>CoMoS <sub>2</sub>                                                           | Phenol                                                                                                                                           | n-decane                      | 30-98  | Batch, 350 °C, 28<br>bar, 150 rpm, and<br>1 h                 | See ref <sup>25</sup>                                                                                                                                                         | 25 |

|    |                                                     |                                             |            |           |                                                            |                                                                                               |           |
|----|-----------------------------------------------------|---------------------------------------------|------------|-----------|------------------------------------------------------------|-----------------------------------------------------------------------------------------------|-----------|
| 33 | Amorphous NiMoS                                     | Phenol                                      | n-decane   | 34.5-96.2 | Batch, 350 °C, 28 bar, 150 rpm, and 1 h                    | For NiMoS-0.3, benzene (30.4%), cyclohexane (52.4%), cyclohexene (9.8%), cyclohexanone (7.4%) | 26        |
| 34 | MoS <sub>2</sub>                                    | Phenol, 4-methylphenol, and 4-methoxyphenol | Hexadecane | 34-52     | Batch, 350 °C, 28 bar, 1000 rpm, and 7 h                   | For phenol, benzene (36%), methylcyclohexane (6%) and cyclohexylbenzene (43%)                 | 27        |
| 35 | NiMoW                                               | Guaiacol                                    | -          | 99        | Continuous, 400 °C, 28 bar, and WHSV = 2.7 h <sup>-1</sup> | Phenol (45%), creosol (15%), catechol (10%), and hydrocarbon (30%)                            | 28        |
| 36 | CoMoS                                               | p-cresol                                    | Dodecane   | 78.8-98.7 | Batch, 350 °C, 28 bar, 900 rpm, and 7 h                    | For CoMo-0.5-200, methylcyclohexane (6.3%), methylcyclohexene (1.5%) and toluene (92.2%)      | 29        |
| 37 | Ni-WMoS                                             | p-cresol                                    | Dodecane   | 85-97.9   | Batch, 300 °C, 40 bar, 700 rpm, and 6 h                    | For W-Mo-0.5, methylcyclohexane (66.7%), methylcyclohexene (3.2%) and toluene (30.3%)         | 30        |
| 38 | NiMo(W)S                                            | 4-methylphenol                              | Decalin    | 93.9-97.8 | Batch, 300 °C, 30 bar, 800 rpm, and 5 h                    | Toluene (87.2%), methylcyclohexane (11.3%), and 4-methylcyclohexene (1.5%)                    | 31        |
| 39 | NiMoWS                                              | 4-methylphenol                              | Decalin    | 87-100    | Batch, 300 °C, 30 bar, 800 rpm, and 5 h                    | Toluene (95.6%), methylcyclohexane (2.9%), and 4-methylcyclohexene (1.5%)                     | 32        |
| 40 | MoP, MoS <sub>2</sub> and MoO <sub>x</sub>          | 4-methylphenol                              | Decalin    | 30-100    | Batch, 300 °C, 30 bar, 800 rpm, and 5 h                    | See ref <sup>33</sup>                                                                         | 33        |
| 41 | MoS <sub>2</sub> (effect of adding CTAB)            | p-cresol                                    | Dodecane   | 42-100    | Batch, 275 or 300 °C, 40 bar, 900 rpm, and 5 h             | See ref <sup>34</sup>                                                                         | 34        |
| 42 | NiMoS                                               | p-cresol                                    | Dodecane   | 67-100    | Batch, 300 °C, 40 bar, 900 rpm, and 5 h                    | For NiMo-0.3, methylcyclohexane (67.1%), 3-methylcyclohexene (4.12%), and toluene (28.8%)     | 35        |
| 43 | Fe-MoS <sub>2</sub>                                 | p-cresol                                    | Dodecane   | 63.3-98.3 | Batch, 250 °C, 40 bar, 900 rpm, and 5 h                    | For FeMo-0.3, methylcyclohexane (3.7%), methylcyclohexene (1.6%), and toluene (94.7%)         | 36        |
| 44 | MoS <sub>2</sub> /Al <sub>2</sub> O <sub>3</sub>    | Propylguaiacol                              | Dodecane   | 99        | Batch, 300 °C, 50 bar, 1000 rpm, and 5 h                   | Propylphenol (17.5%), cycloalkanes (70.2%) and aromatics (11.8%)                              | This work |
| 45 | Ni/MoS <sub>2</sub> /Al <sub>2</sub> O <sub>3</sub> | Propylguaiacol                              | Dodecane   | 99        | Batch, 300 °C, 50 bar, 1000 rpm, and 5 h                   | Cycloalkanes (93.9%) and aromatics (7.9%)                                                     | This work |
| 46 | Cu/MoS <sub>2</sub> /Al <sub>2</sub> O <sub>3</sub> | Propylguaiacol                              | Dodecane   | 99        | Batch, 300 °C, 50 bar, 1000 rpm, and 5 h                   | Propylphenol (47.2%), cycloalkanes (44.4%) and aromatics (5.7%)                               | This work |

|    |                                                     |                |          |    |                                          |                                                                  |           |
|----|-----------------------------------------------------|----------------|----------|----|------------------------------------------|------------------------------------------------------------------|-----------|
| 47 | Zn/MoS <sub>2</sub> /Al <sub>2</sub> O <sub>3</sub> | Propylguaiacol | Dodecane | 99 | Batch, 300 °C, 50 bar, 1000 rpm, and 5 h | Propylphenol (11.3%), cycloalkanes (67.2%) and aromatics (18.9%) | This work |
| 48 | Fe/MoS <sub>2</sub> /Al <sub>2</sub> O <sub>3</sub> | Propylguaiacol | Dodecane | 99 | Batch, 300 °C, 50 bar, 1000 rpm, and 5 h | Propylphenol (26.2%), cycloalkanes (58.1%) and aromatics (16.2%) | This work |

a)

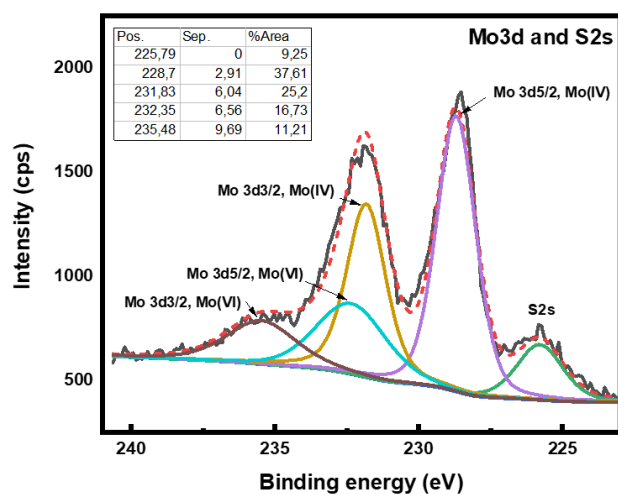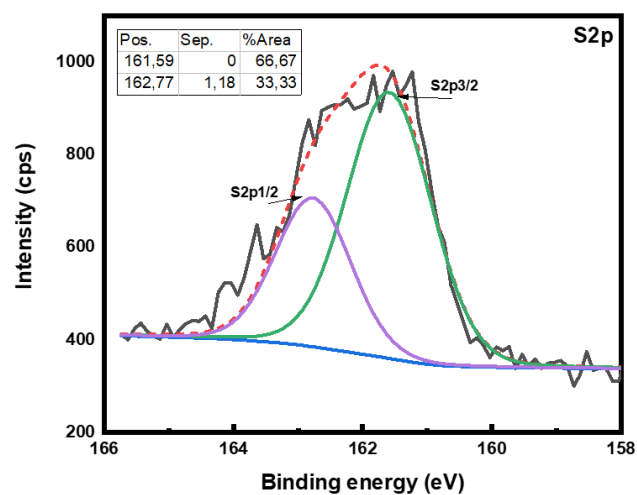

b)

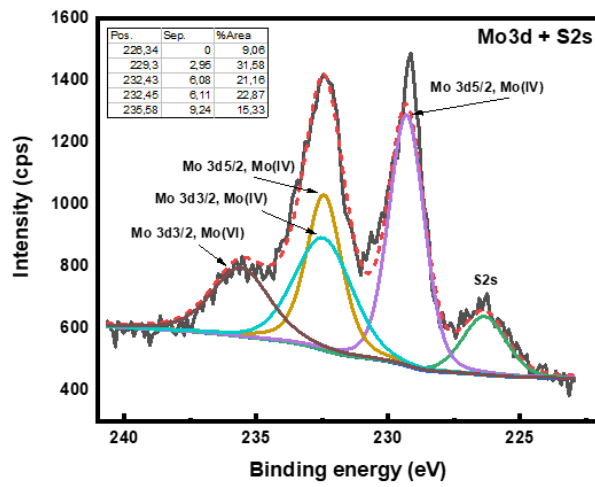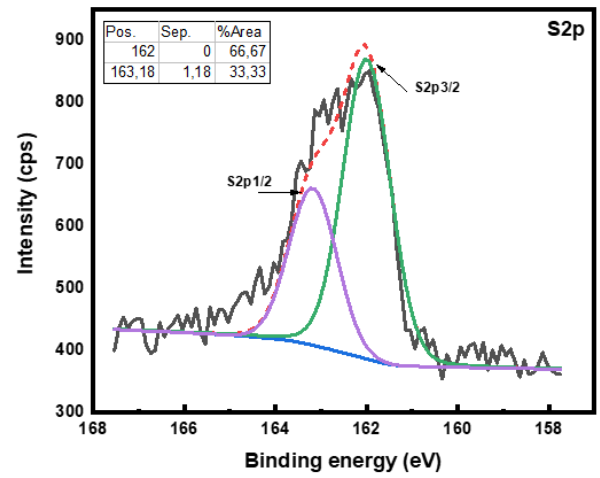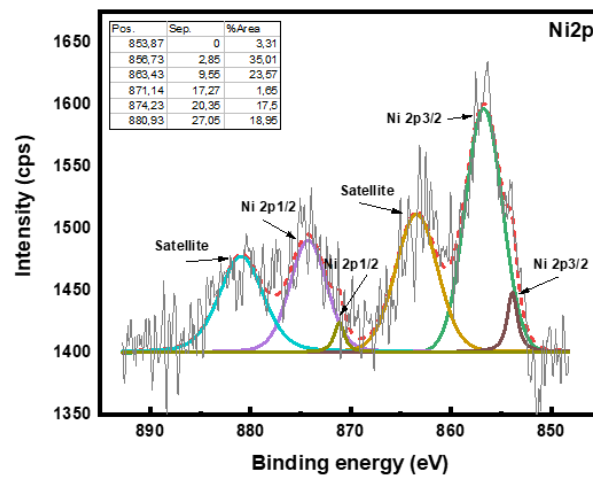

c)

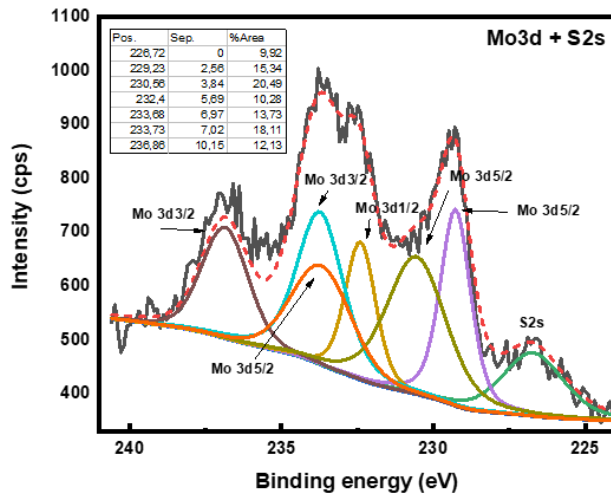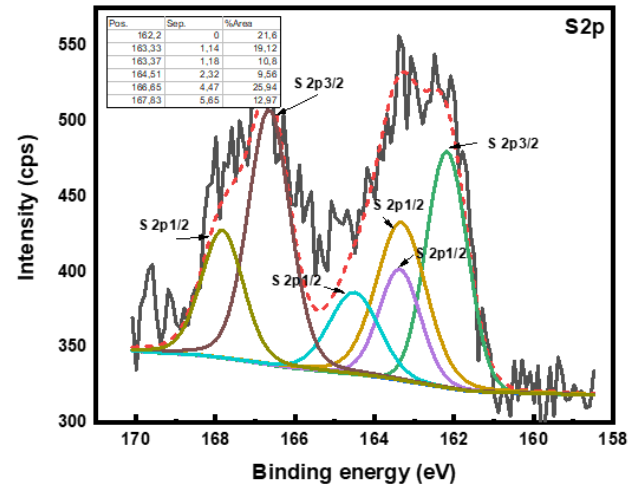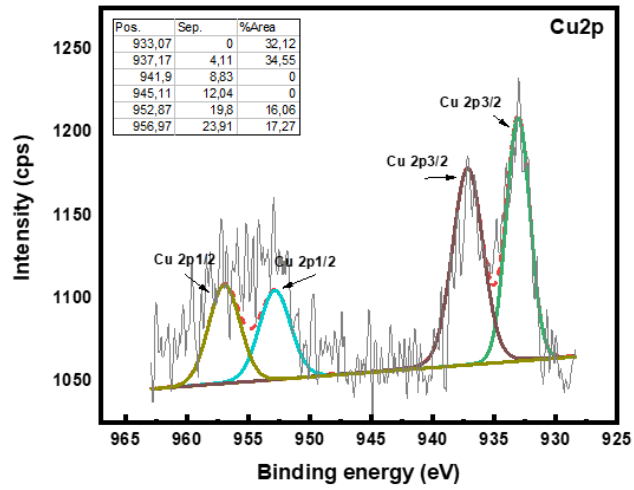

d)

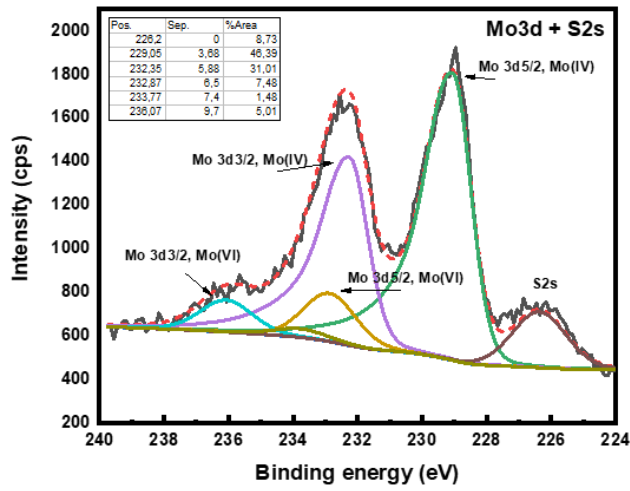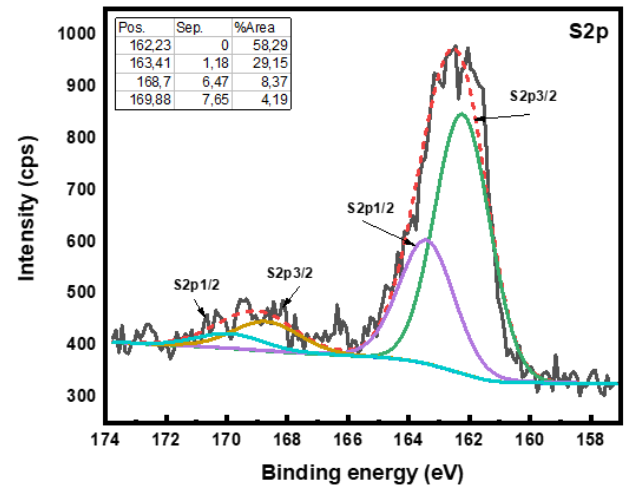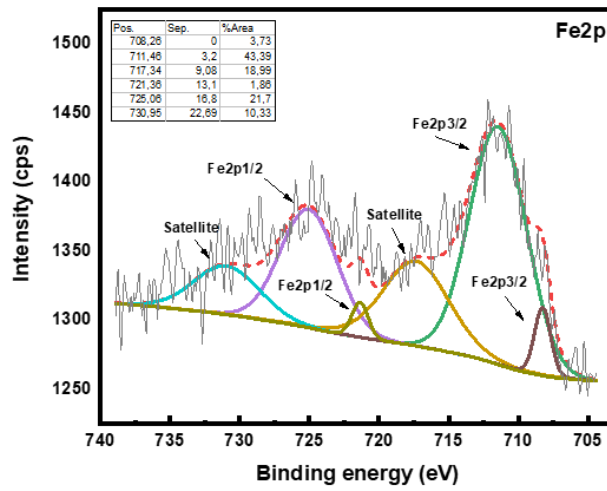



e)

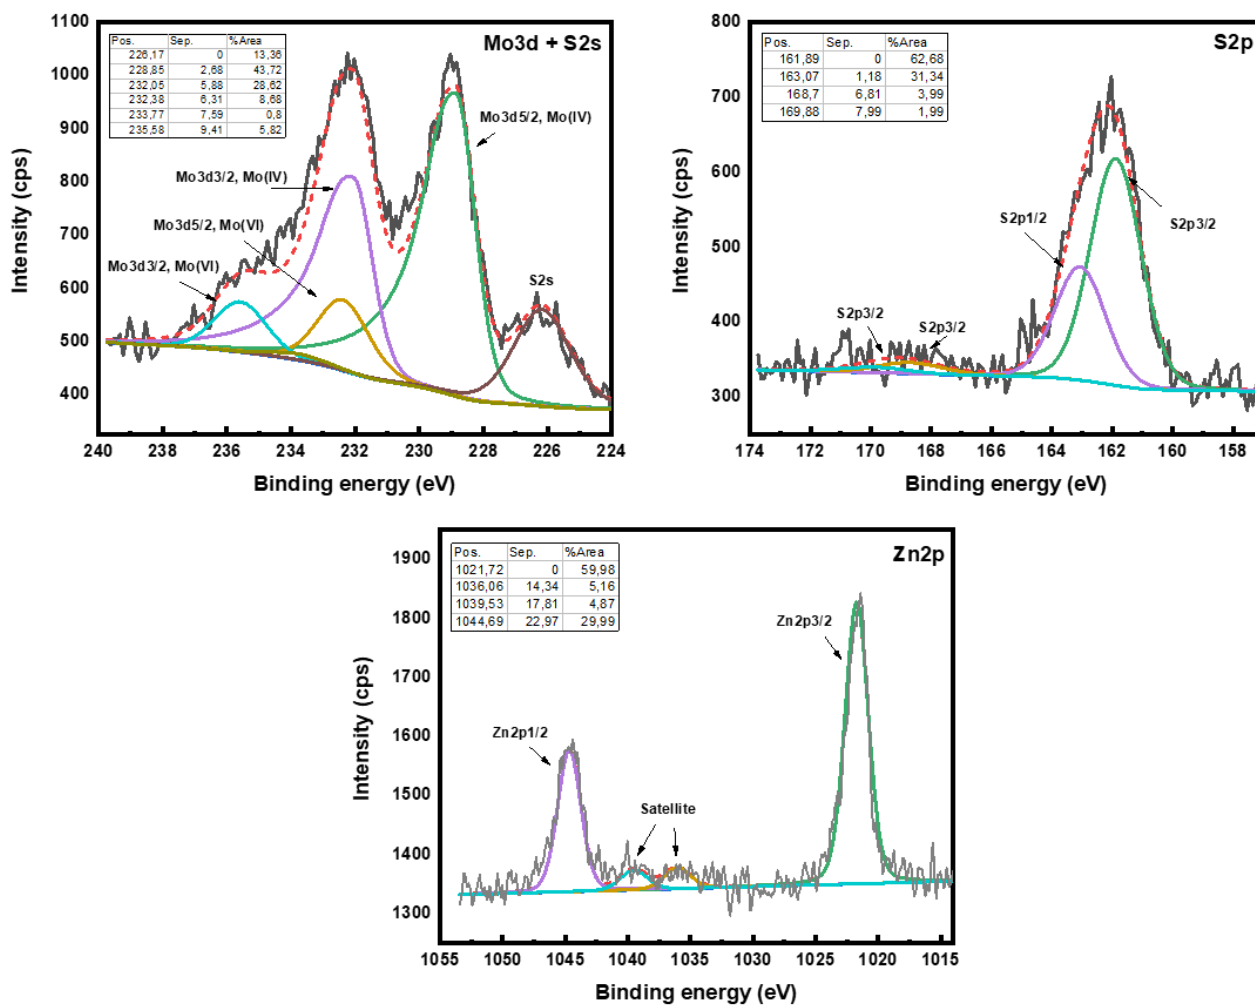

Figure S1 XPS spectra for sulfided a) Mo b) NiMo c) CuMo d) FeMo and e) ZnMo sulfided catalysts.

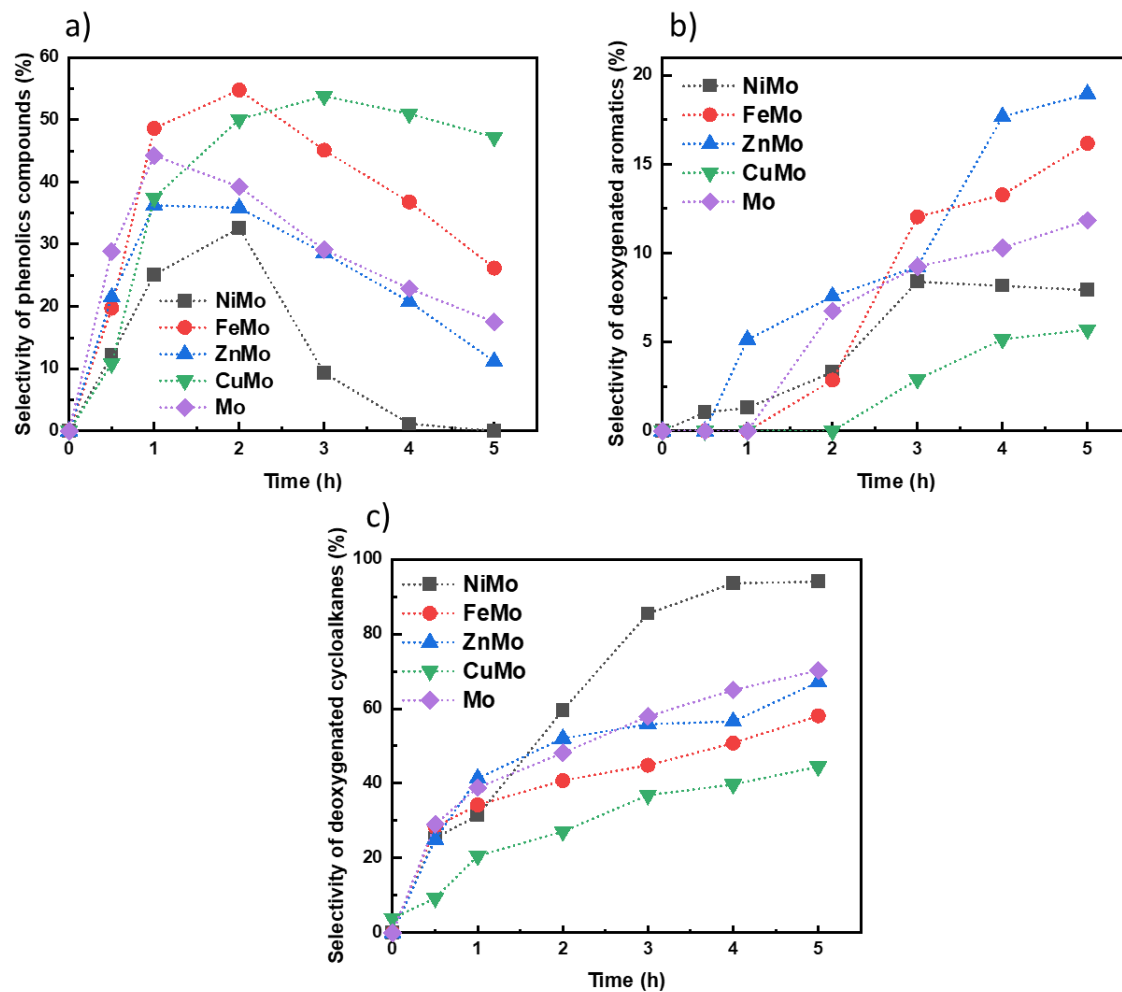

Figure S2 Products selectivity for a) phenolics, b) deoxygenated aromatics, and c) deoxygenated cycloalkanes over sulfided catalysts in HDO of PG.

Table S2: Individual reaction product selectivity (major and side products) over sulfided catalysts in HDO of PG at 5 h.

| Selectivity                          | Mo   | NiMo | CuMo | ZnMo | FeMo |
|--------------------------------------|------|------|------|------|------|
| Deoxygenated cycloalkanes            |      |      |      |      |      |
| Propylcyclopentane                   | -    | 0.8  | -    | -    | -    |
| 1-methyl-2-propylcyclopentane        | 4.5  | 2.9  | 3.9  | -    | 4.5  |
| Propylcyclohexane                    | 41.2 | 80.3 | 27.6 | 55.7 | 49.6 |
| Propylcyclohexene                    | 8.3  | -    | 8.9  | -    | 0.5  |
| 1-methyl-2-propylcyclohexane         | 16.3 | 10.1 | 3.0  | 11.8 | 3.4  |
| 1-butenylcyclopentane                | -    | -    | 0.9  | -    | -    |
| Deoxygenated aromatics               |      |      |      |      |      |
| Propylbenzene                        | 3.6  | 5.2  | 3.2  | 19.1 | 16.2 |
| 3-methyl-6-propylbenzene             | -    | -    | 1.2  | -    | -    |
| 1-methyl-3-propylbenzene             | 8.3  | 1.6  | 1.4  | -    | -    |
| Phenolics                            |      |      |      |      |      |
| Propylphenol                         | 12.7 | -    | 41.6 | 9.6  | 23.7 |
| 4-(1-methylpropyl)-phenol            | 4.8  | -    | 5.6  | 1.6  | 2.1  |
| 1-methoxyl-4-(1-methylpropyl)benzene | -    | -    | 0.3  | -    | -    |

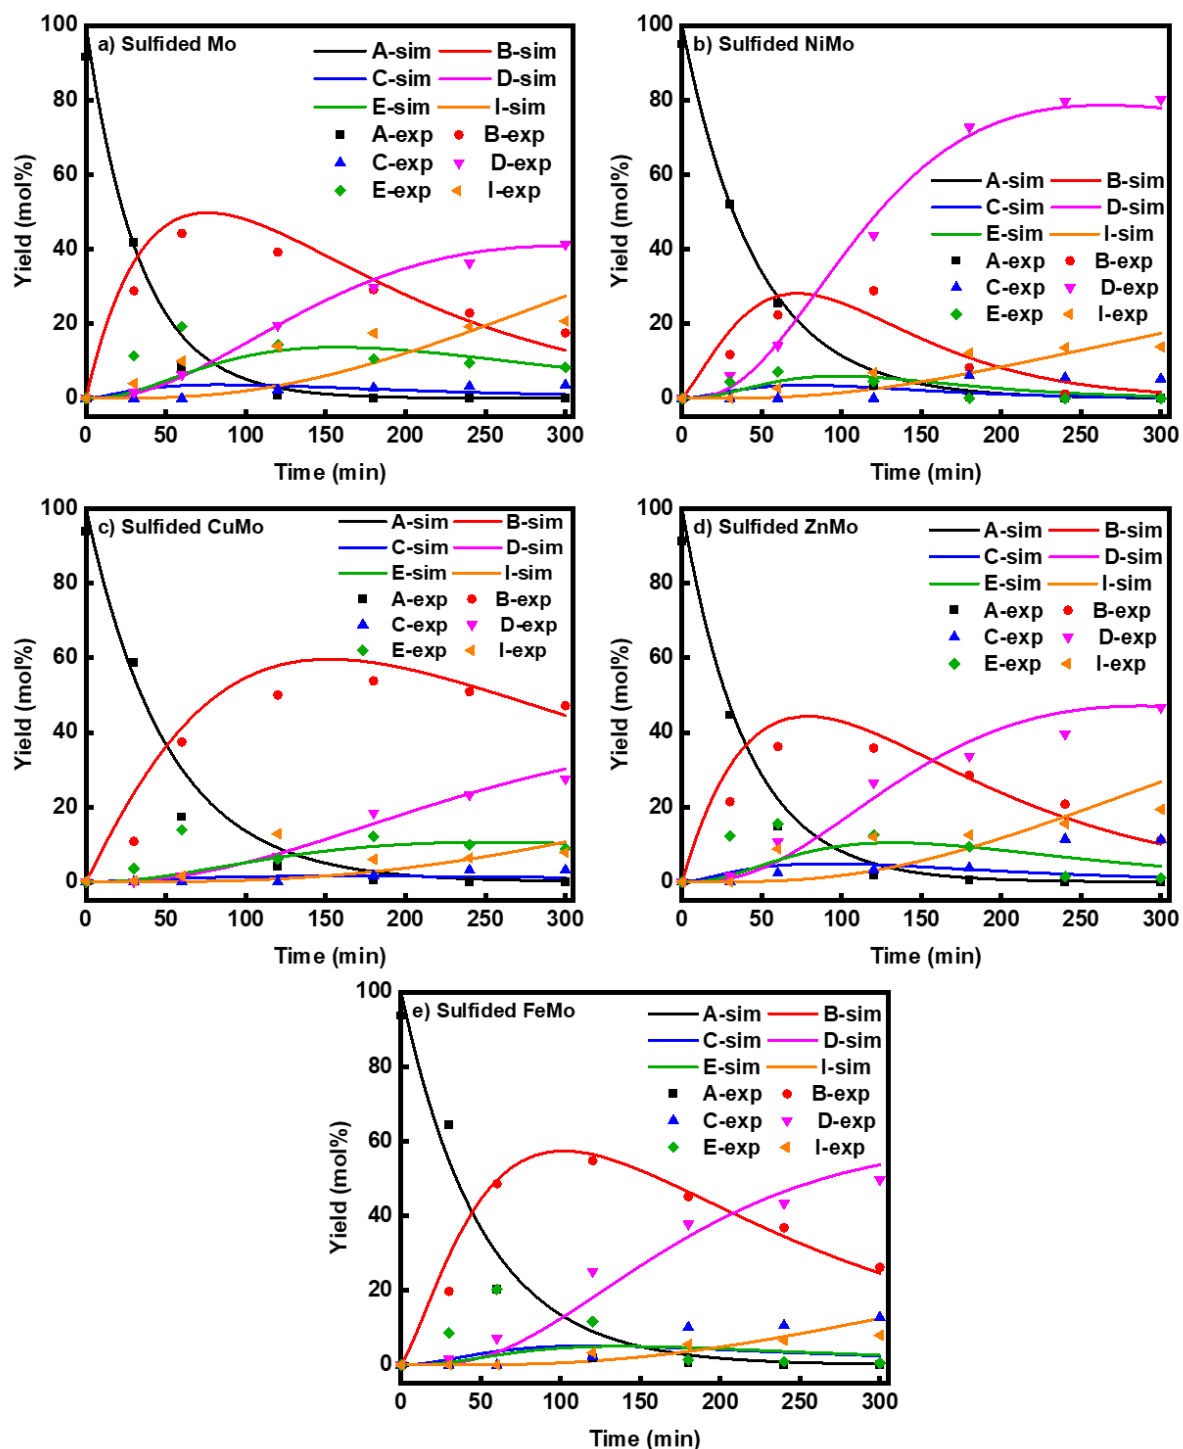

Figure S3 HDO of PG over sulfided (a) Mo, (b) NiMo, (c) CuMo, (d) ZnMo, and (e) FeMo at a total pressure of 50 bar and 300 °C. The solid line denotes the modeling results and the symbols correspond to the experimental values (product yield versus reaction time). Notation: A = Propylguaiacol, B = 4-propylphenol, C = Propylbenzene, D = Propylcyclohexane, E = Propylcyclohexene and I = sum of propylcyclopentane, 1-methyl-2-propylcyclopentane and 1-methyl-2-propylcyclohexane.

Table S3: Apparent kinetic rate constant values for all catalyst systems for HDO of PG.

\*Simplified model

| The kinetic rate constant (min <sup>-1</sup> ) | *NiMo              | Mo                 | NiMo               | CuMo               | ZnMo               | FeMo                                |
|------------------------------------------------|--------------------|--------------------|--------------------|--------------------|--------------------|-------------------------------------|
| $k_1$                                          | 0.0161 ±<br>0.0036 | 0.0186 ±<br>0.0066 | 0.0053 ±<br>0.0066 | 0.0074 ±<br>0.0058 | 0.0148 ±<br>0.0067 | 0.0071 ±<br>0.0235                  |
| $k_2$                                          | 0.0167 ±<br>0.0051 | 0.0089 ±<br>0.0013 | 0.0236 ±<br>0.0039 | 0.0032 ±<br>0.0005 | 0.0105 ±<br>0.0017 | 0.0061 ±<br>0.0008                  |
| $k_3$                                          | 0.0597 ±<br>0.0577 | 0.0365 ±<br>0.0808 | 0.0850 ±<br>0.2364 | 0.0575 ±<br>0.2363 | 0.0165 ±<br>0.1105 | 8.2378×10 <sup>-6</sup><br>± 0.4095 |
| $k_4$                                          | 0                  | 0.0063 ±<br>0.0061 | 0.0145 ±<br>0.0059 | 0.0079 ±<br>0.0049 | 0.0074 ±<br>0.0068 | 0.0111 ±<br>0.0242                  |
| $k_5$                                          | 0                  | 0.0170 ±<br>0.0232 | 0.0288 ±<br>0.0155 | 0.0165 ±<br>0.0141 | 0.0202 ±<br>0.0251 | 0.0610 ±<br>0.1408                  |
| $k_6$                                          | 0                  | 0.0047 ±<br>0.0057 | 0.0018 ±<br>0.0054 | 0.0054 ±<br>0.0059 | 0.0028 ±<br>0.0044 | 0.0017 ±<br>0.0063                  |
| $k_7$                                          | 0                  | 0.0156 ±<br>0.0267 | 0.0266 ±<br>0.1015 | 0.0205 ±<br>0.0296 | 0.0113 ±<br>0.0249 | 0.0224 ±<br>0.1075                  |
| $k_8$                                          | 0                  | 0.0126 ±<br>0.0196 | 0.0035 ±<br>0.0075 | 0.0034 ±<br>0.0248 | 0.0103 ±<br>0.0137 | 0.0034 ±<br>0.0068                  |
| $k_9$                                          | 0                  | 0.0714 ±<br>0.1204 | 0.0992 ±<br>0.2610 | 0.0941 ±<br>0.3544 | 0.0673 ±<br>0.1333 | 0.0637 ±<br>0.4129                  |
| $k_{10}$                                       | 0                  | 0.0147 ±<br>0.0163 | 0.0553 ±<br>0.1364 | 0.0092 ±<br>0.0234 | 0.0282 ±<br>0.0505 | 0.0644 ±<br>0.4306                  |
| $k_{11}$                                       | 0                  | 0.0039 ±<br>0.0011 | 0.0011 ±<br>0.0002 | 0.0012 ±<br>0.0020 | 0.0033 ±<br>0.0009 | 0.0016 ±<br>0.0009                  |
| $R_2$                                          | 90.5               | 89.7               | 97.0               | 90.1               | 88.3               | 91.0                                |

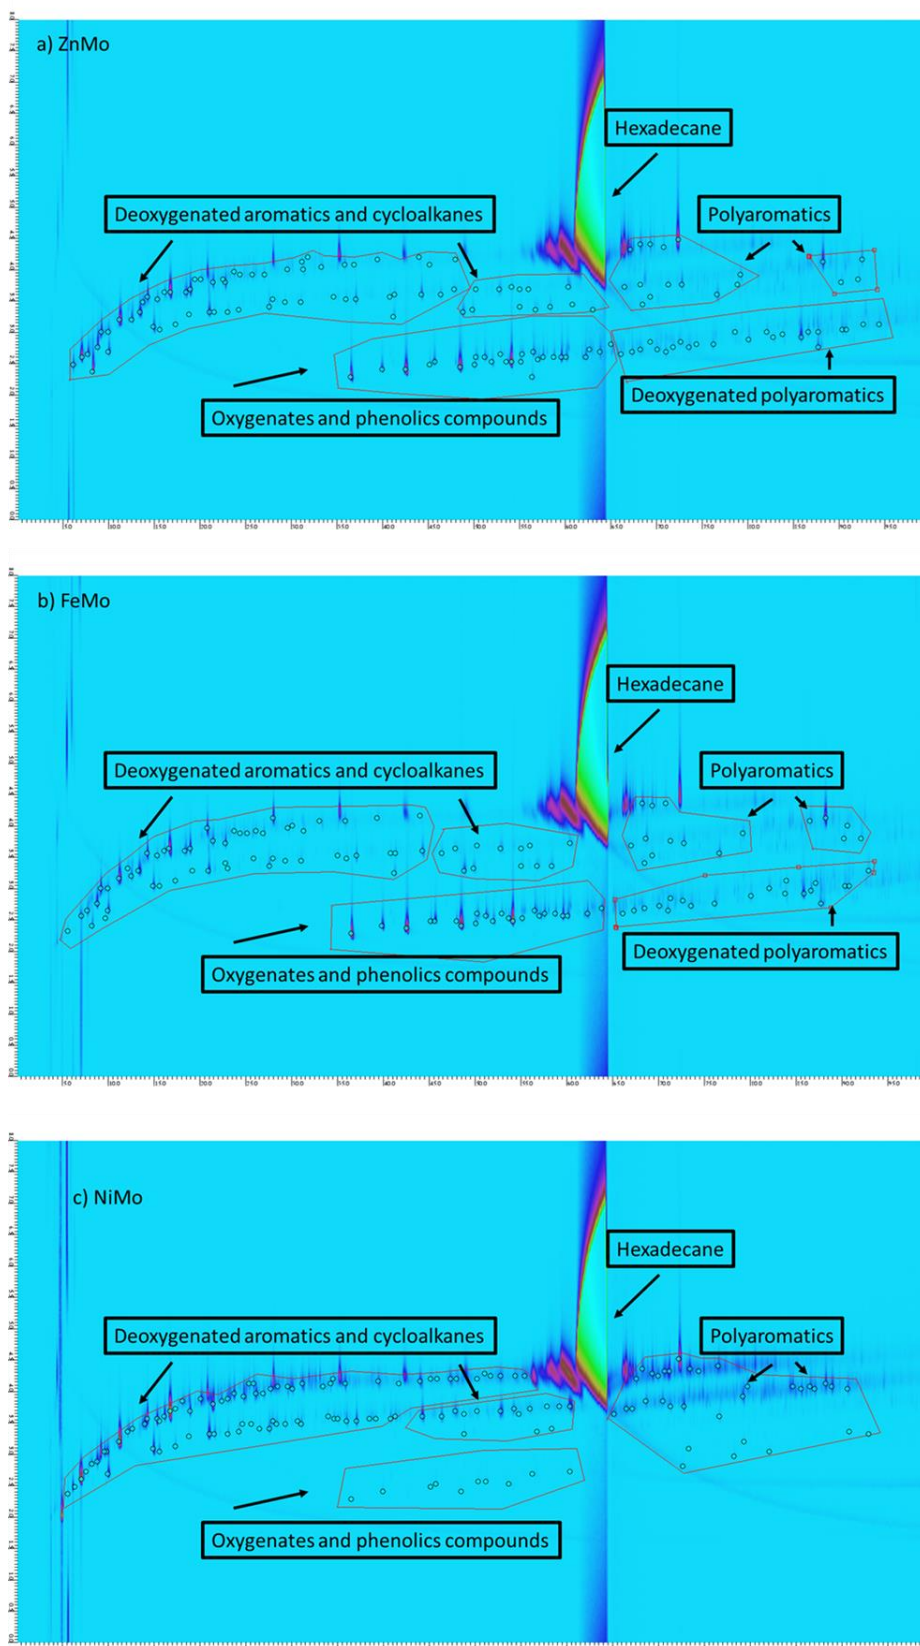

Figure S4 2D GC x GC chromatograms for hydrotreatment of kraft lignin over sulfided a) ZnMo, b) FeMo, and c) NiMo at 340 °C and 40 bar initial H<sub>2</sub> pressure.

## References

- 1 K. Wu, Y. Liu, W. Wang, Y. Huang, W. Li, Q. Shi and Y. Yang, *Mol. Catal.*, , DOI:10.1016/j.mcat.2019.110537.
- 2 C. C. Templis, C. J. Revelas, A. A. Papastyliaou and N. G. Papayannakos, *Ind. Eng. Chem. Res.*, 2019, **58**, 6278–6287.
- 3 W. Song, S. Zhou, S. Hu, W. Lai, Y. Lian, J. Wang, W. Yang, M. Wang, P. Wang and X. Jiang, *ACS Catal.*, 2019, **9**, 259–268.
- 4 J. A. Tavizón-Pozos, V. A. Suárez-Toriello, P. Del Ángel and J. A. De Los Reyes, *Int. J. Chem. React. Eng.*, 2016, **14**, 1211–1223.
- 5 A. Infantes-Molina, B. Pawelec, J. L. G. Fierro, C. V. Loricera, A. Jiménez-López and E. Rodríguez-Castellón, *Top. Catal.*, 2015, **58**, 247–257.
- 6 Y. K. Hong, D. W. Lee, H. J. Eom and K. Y. Lee, *J. Mol. Catal. A Chem.*, 2014, **392**, 241–246.
- 7 Y. Romero, F. Richard and S. Brunet, *Appl. Catal. B Environ.*, 2010, **98**, 213–223.
- 8 C. García-Mendoza, C. E. Santolalla-Vargas, L. G. Woolfolk, P. del Ángel and J. A. de los Reyes, *Catal. Today*, , DOI:10.1016/j.cattod.2020.08.026.
- 9 M. Badawi, J. F. Paul, E. Payen, Y. Romero, F. Richard, S. Brunet, A. Popov, E. Kondratieva, J. P. Gilson, L. Mariey, A. Travert and F. Maugé, *Oil Gas Sci. Technol.*, 2013, **68**, 829–840.
- 10 A. Gutierrez, E. M. Turpeinen, T. R. Viljava and O. Krause, *Catal. Today*, 2017, **285**, 125–134.
- 11 A. L. Jongerius, R. Jastrzebski, P. C. A. Bruijninx and B. M. Weckhuysen, *J. Catal.*, 2012, **285**, 315–323.
- 12 E. M. Ryymin, M. L. Honkela, T. R. Viljava and A. O. I. Krause, *Appl. Catal. A Gen.*, 2010, **389**, 114–121.
- 13 Y. Yang, A. Gilbert and C. (Charles) Xu, *Appl. Catal. A Gen.*, 2009, **360**, 242–249.
- 14 O. I. Şenol, E. M. Ryymin, T. R. Viljava and A. O. I. Krause, *J. Mol. Catal. A Chem.*, 2007, **277**, 107–112.
- 15 F. E. Massoth, P. Politzer, M. C. Concha, J. S. Murray, J. Jakowski and J. Simons, *J. Phys. Chem. B*, 2006, **110**, 14283–14291.
- 16 M. Ferrari, S. Bosmans, R. Maggi, B. Delmon and P. Grange, *Catal. Today*, 2001, **65**, 257–264.
- 17 P. E. Ruiz, B. G. Frederick, W. J. De Sisto, R. N. Austin, L. R. Radovic, K. Leiva, R. García, N. Escalona and M. C. Wheeler, 2012, **27**, 44–48.
- 18 S. Mukundan, M. Konarova, L. Atanda, Q. Ma and J. Beltramini, *Catal. Sci. Technol.*, 2015, **5**, 4422–4432.
- 19 K. Leiva, C. Sepúlveda, R. García, J. L. G. Fierro and N. Escalona, *Catal. Commun.*, 2014, **53**, 33–37.

- 20 K. Leiva, N. Martinez, C. Sepulveda, R. García, C. A. Jiménez, D. Laurenti, M. Vrinat, C. Geantet, J. L. G. Fierro, I. T. Ghampson and N. Escalona, *Appl. Catal. A Gen.*, 2015, **490**, 71–79.
- 21 C. Sepúlveda, R. García, P. Reyes, I. T. Ghampson, J. L. G. Fierro, D. Laurenti, M. Vrinat and N. Escalona, *Appl. Catal. A Gen.*, 2014, **475**, 427–437.
- 22 C. Sepúlveda, N. Escalona, R. García, D. Laurenti and M. Vrinat, *Catal. Today*, 2012, **195**, 101–105.
- 23 P. E. Ruiz, K. Leiva, R. Garcia, P. Reyes, J. L. G. Fierro and N. Escalona, *Appl. Catal. A Gen.*, 2010, **384**, 78–83.
- 24 W. Wang, L. Li, K. Wu, G. Zhu, S. Tan, Y. Liu and Y. Yang, *RSC Adv.*, 2016, **6**, 31265–31271.
- 25 B. Yoosuk, D. Tumnantong and P. Prasassarakich, *Chem. Eng. Sci.*, 2012, **79**, 1–7.
- 26 B. Yoosuk, D. Tumnantong and P. Prasassarakich, *Fuel*, , DOI:10.1016/j.fuel.2011.08.001.
- 27 Y. Q. Yang, C. T. Tye and K. J. Smith, *Catal. Commun.*, 2008, **9**, 1364–1368.
- 28 C. C. Tran, F. Stankovikj, M. Garcia-Perez and S. Kaliaguine, *Catal. Commun.*, 2017, **101**, 71–76.
- 29 W. Wang, K. Zhang, L. Li, K. Wu, P. Liu and Y. Yang, *Ind. Eng. Chem. Res.*, 2014, **53**, 19001–19009.
- 30 W. Wang, K. Zhang, Z. Qiao, L. Li, P. Liu and Y. Yang, *Catal. Commun.*, 2014, **56**, 17–22.
- 31 C. Wang, D. Wang, Z. Wu, Z. Wang, C. Tang and P. Zhou, *Appl. Catal. A Gen.*, 2014, **476**, 61–67.
- 32 C. Wang, Z. Wu, C. Tang, L. Li and D. Wang, *Catal. Commun.*, 2013, **32**, 76–80.
- 33 V. M. L. Whiffen and K. J. Smith, *Energy and Fuels*, 2010, **24**, 4728–4737.
- 34 W. Wang, L. Li, K. Zhang, Z. Qiao, P. Liu and Y. Yang, *React. Kinet. Mech. Catal.*, 2014, **113**, 417–429.
- 35 W. Wang, L. Li, K. Wu, K. Zhang, J. Jie and Y. Yang, *Appl. Catal. A Gen.*, 2015, **495**, 8–16.
- 36 X. Guo, W. Wang, K. Wu, Y. Huang, Q. Shi and Y. Yang, *Biomass and Bioenergy*, 2019, **125**, 34–40.
